# Supplementary material for: Molecular basis for RNA polymerase-dependent transcription complex recycling by the helicase-like motor protein HelD
Source: PubMed Central journal article supplement (PMC7749167; doi:10.1038/s41467-020-20157-5), 2020-12-18
Supplement: 41467_2020_20157_MOESM3_ESM.pdf [file 41467_2020_20157_MOESM3_ESM.pdf]

## **Description of Additional Supplementary Files**

**Supplementary Movie 1:** RNAP elongation complex. The movie shows a 360° rotation of the EC.

**Supplementary Movie 2:** RNAP-HeID complex. The movies shows a 360° rotation of the RNAP-HeID complex, and highlights the Clamp and Secondary Channel arms of HeID.

**Supplementary Movie 3:** RNAP remodelling by HeID. The movie shows the conformational changes induced in RNAP by HeID.

**Supplementary Movie 4:** 3D variability analysis of the RNAP-HeID complex. The movie shows the results of 3D variability analysis of the RNAP-HeID complex which highlights how secondary channel arm anchoring provides a platform for primary channel opening by movement of the clamp arm.
